# Supplementary material for: Nanoconfinement-induced calcium ion redox charge storage of V2CTx MXene
Source: Royal Society of Chemistry journal article supplement (doi:10.1039/d4ta05932h), 2024-01-01
Supplement: d4ta05932h1.pdf [file d4ta05932h1.pdf]

**Electronic Supplementary Information (ESI)**

**Nanoconfinement-induced Calcium ion Redox Charge Storage of V<sub>2</sub>CT<sub>x</sub>  
MXene**

**Suman Yadav and Narendra Kurra\***

Department of Chemistry, Indian Institute of Technology Hyderabad, Kandi-502284,  
Sangareddy, Telangana State, India.

**\*Corresponding Author**

**E-mail: [narendra@chy.iith.ac.in](mailto:narendra@chy.iith.ac.in)**

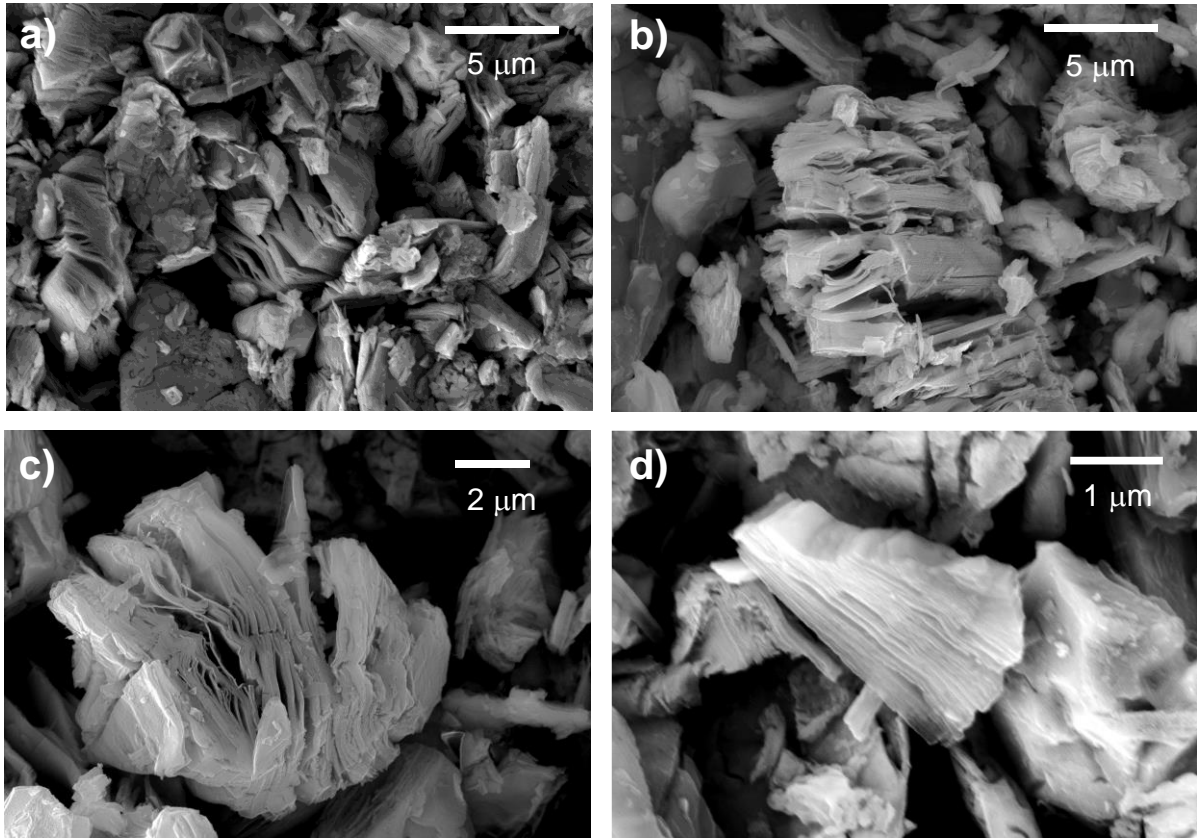

**Fig. S1** SEM images of  $ml\text{-V}_2\text{CT}_x$  MXene at low (a,b) and high (c,d) magnifications.

Fig. S1 shows the open and accordion-like morphology for  $ml\text{-V}_2\text{CT}_x$  at different magnifications. Alhabeab *et al.* compared the HF concentration (30 wt%, 10 wt%, and 5 wt%) for the removal of the ‘Al’ atomic layer from the  $\text{Ti}_3\text{AlC}_2$  MAX phase and hence concluded that the 5 wt% HF is sufficient for the etching of Al atomic layer from the MAX precursor.<sup>1</sup> However, the accordion-like morphology of  $ml\text{-Ti}_3\text{C}_2\text{T}_x$  for 5 wt% etchant is not as prevalent as 30 wt% (as per as SEM imaging is concerned). Mixed acid etchant (HF/HCl) was used for the synthesis of  $ml\text{-V}_2\text{CT}_x$  MXene.<sup>2</sup> The concentrated HF etchant may introduce a high density of defects in  $\text{V}_2\text{CT}_x$  MXene when compared to a mixed acid etchant (HF/HCl) with a lower content of HF. The enlargement of the  $d$ -spacing of  $5.5 \text{ \AA}$  ( $2\theta \sim 7.34^\circ$ , corresponding to a  $d$ -spacing of  $12.03 \text{ \AA}$ ) for the  $ml\text{-V}_2\text{CT}_x$  in comparison with the parent MAX phase is clear evidence of etching of ‘Al’ atomic layers.

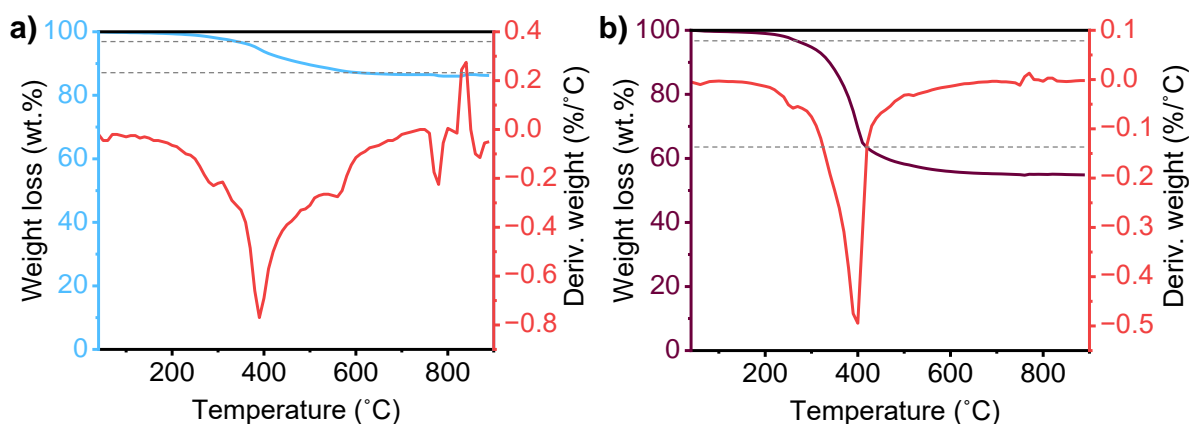

**Fig. S2** Thermogravimetric curves with the derivative of weight loss of (a)  $ml$ - $V_2CT_x$  MXene powder (blue) and (b) pre-intercalated  $ml$ - $V_2CT_x$  MXene powder (vinous).

To further characterize the adsorption/intercalation of EMIM-TFSI ionic liquid into  $ml$ - $V_2CT_x$  MXene, thermogravimetric analysis was done for  $ml$ - $V_2CT_x$  MXene powder (blue) (Fig. S2a) and pre-intercalated  $ml$ - $V_2CT_x$  MXene powder (vinous) (Fig. S2b). The characteristic decomposition at a temperature of 400 °C is attributed to the EMIM-TFSI, which is not the case for the pristine  $ml$ - $V_2CT_x$  MXene (Fig. S2a). In pristine  $ml$ - $V_2CT_x$  MXene, the weight loss (up to 10 wt%) at high temperatures (>350 °C) is attributed to the dissociation of surface functional groups and also chemisorbed or structural water removal from multilayer powder.<sup>2</sup> However, in the case of the pre-intercalated  $ml$ - $V_2CT_x$  MXene sample, significant weight loss of up to 40 wt% is due to the decomposition of EMIM-TFSI besides the residual structural water desorption and functional groups decomposition.<sup>3</sup> The total weight loss is 30 wt% for the decomposition of EMIM-TFSI ionic liquid. Due to the non-volatile nature and low vapor pressure of EMIM-TFSI, the typical incorporation of ionic liquid is estimated to be 30 w/w% into  $V_2CT_x$ .

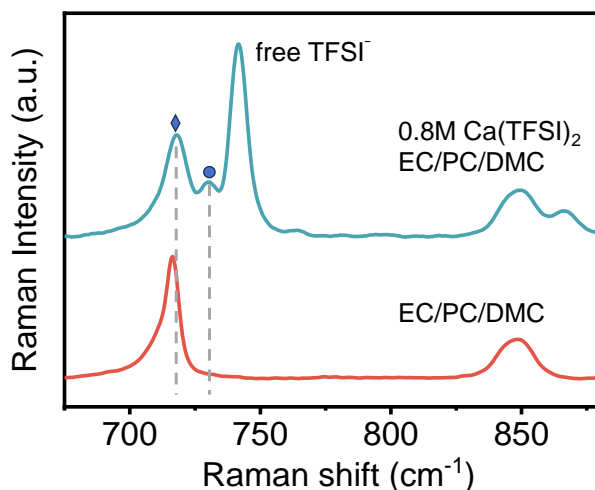

**Fig. S3** Raman spectra of pure solvent (EC/PC/DMC) (red) and 0.8M Ca(TFSI)<sub>2</sub>/EC/PC/DMC electrolyte (blue), ♦ -- pure solvent, ● -- Ca-ion coordinated solvent.

In Raman spectra of 0.8M Ca(TFSI)<sub>2</sub>/EC/PC/DMC electrolyte, the peak at 718 cm<sup>-1</sup> corresponds to the solvent mixture (i.e., EC/PC/DMC); however, two additional peaks at 730 cm<sup>-1</sup> and 741 cm<sup>-1</sup> correspond to the coordination of Ca-ions with the EC/PC/DMC. The sharp peak at 741 cm<sup>-1</sup> corresponds to a free TFSI anion in the electrolyte. The characteristic Raman signatures of the electrolyte at a concentration of 0.8M Ca(TFSI)<sub>2</sub>/EC/PC/DMC are in accordance with the reported literature.<sup>4</sup>

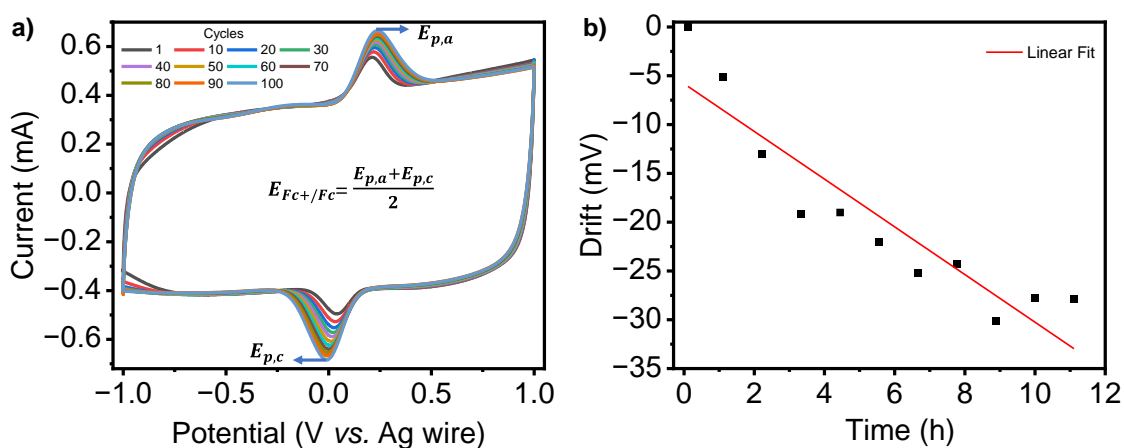

**Fig. S4** (a) Cyclic voltammograms of a 3-electrode cell consisting of a mixture of 15 mM ferrocene + 0.8 M Ca(TFSI)<sub>2</sub>/EC/PC/DMC electrolyte at a scan rate of 10 mV s<sup>-1</sup>. (b) drift of the Ag wire reference electrode over 11 hours in electrolyte mixture.

Fig. S4 shows the 3-electrode data of  $\text{Fc}^+/\text{Fc}$  redox couple with the drift in the potential of the Ag wire over 11 hours. The half-wave potential of the ferrocenium/ferrocene redox couple is given by

$$E_{\text{Fc}^+/\text{Fc}} = \frac{E_{p,a} + E_{p,c}}{2}$$

where  $E_{\text{Fc}^+/\text{Fc}}$  is the reduction potential of the ferrocenium/ferrocene redox couple,  $E_{p,a}$  and  $E_{p,c}$  are anodic and cathodic peak potentials, respectively. The potential of the  $\text{Fc}^+/\text{Fc}$  redox couple is 0.12 V vs. Ag wire, and it is 0.4 V vs. SHE.<sup>5</sup> Hence the potential of the Ag wire is 0.27 V vs. SHE.

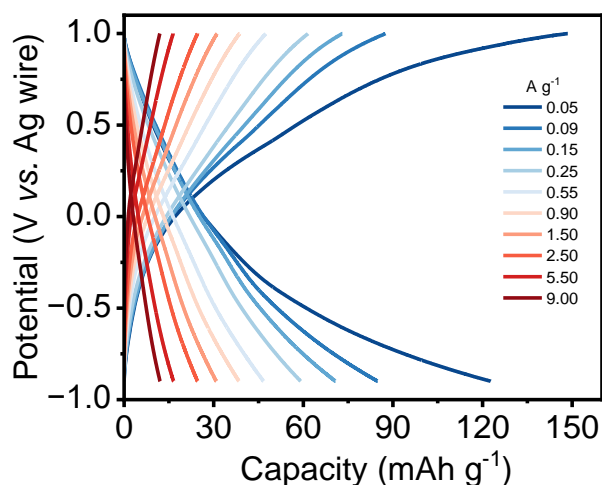

**Fig. S5** The galvanostatic charge-discharge profiles at different current densities (0.05, 0.09, 0.15, 0.25, 0.55, 0.90, 1.50, 2.50, 5.50, and 9.0 A g<sup>-1</sup>).

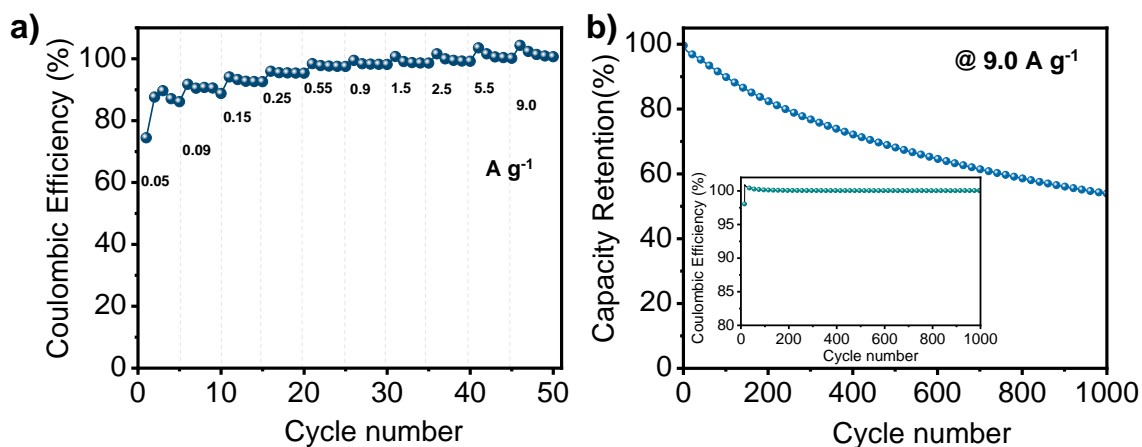

**Fig. S6** Electrochemical performance of pre-intercalated  $ml\text{-V}_2\text{CT}_x$  MXene in 0.8M  $\text{Ca}(\text{TFSI})_2/\text{EC}/\text{PC}/\text{DMC}$  electrolyte. (a) Coulombic efficiency versus cycle number plot at different current densities (0.05, 0.09, 0.15, 0.25, 0.55, 0.90, 1.50, 2.50, 5.50, and 9.0  $\text{A g}^{-1}$ ). (b) Cycling performance of pre-intercalated  $ml\text{-V}_2\text{CT}_x$  MXene electrode in non-aqueous 0.8M  $\text{Ca}(\text{TFSI})_2$  electrolyte over 1000 cycles (capacity retention of  $\sim 54\%$ ) at a current density of 9.0  $\text{A g}^{-1}$  and inset showing the Coulombic efficiency with cycle number.

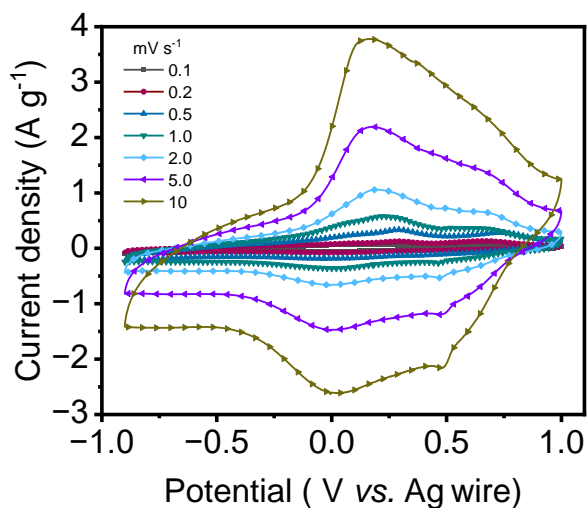

**Fig. S7** (a) Cyclic voltammograms of pre-intercalated  $ml\text{-V}_2\text{CT}_x$  MXene in 0.8M  $\text{Ca}(\text{TFSI})_2/\text{EC}/\text{PC}/\text{DMC}$  electrolyte at various scan rates (0.1, 0.2, 0.5, 1.0, 2.0, 5.0, 10  $\text{mV s}^{-1}$ ).

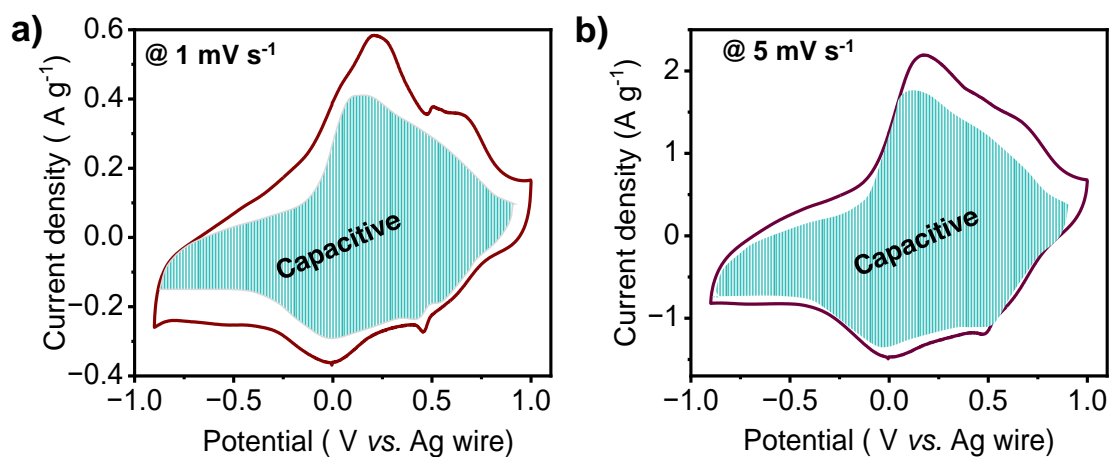

**Fig. S8** CV curves of pre-intercalated  $ml\text{-V}_2\text{CT}_x$  MXene at (a)  $1 \text{ mV s}^{-1}$  and (b)  $5 \text{ mV s}^{-1}$  scan rates, shaded regions correspond to capacitive contributions (green), that are estimated based on  $k_1k_2$  analysis.

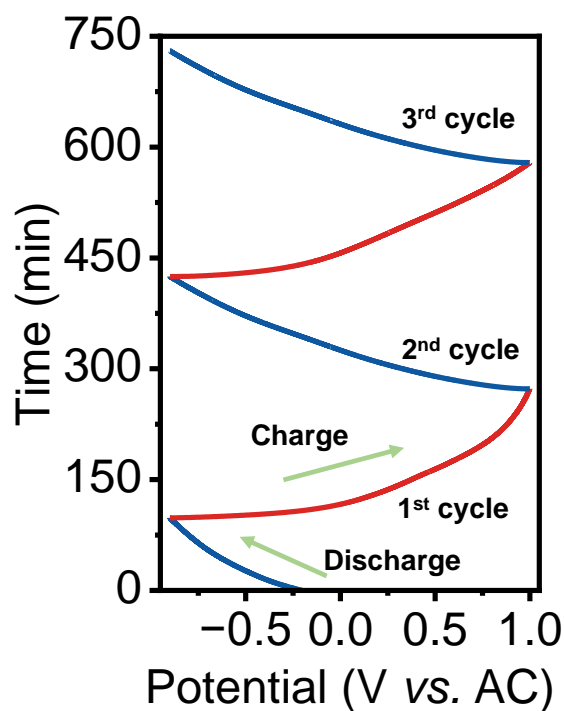

**Fig. S9** Galvanostatic charge-discharge (GCD) profiles of pre-intercalated  $ml\text{-V}_2\text{CT}_x$  MXene in  $0.8\text{M Ca}(\text{TFSI})_2/\text{EC}/\text{PC}/\text{DMC}$  during *in-situ* XRD measurements.

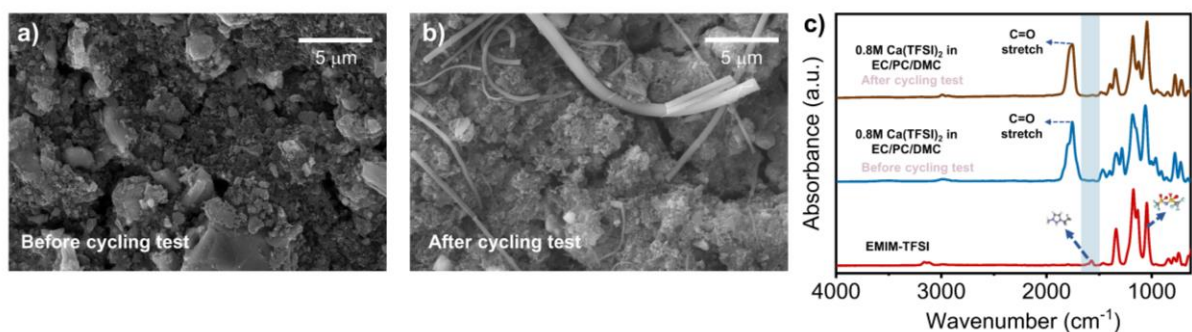

**Fig. S10** Top view SEM images of pre-intercalated  $ml\text{-V}_2\text{CT}_x$  MXene (a) before and (b) after cycling the electrode. (c) Attenuated total reflectance (ATR) - FTIR spectra of pure EMIM-TFSI ionic liquid (red) and 0.8M  $\text{Ca}(\text{TFSI})_2/\text{EC}/\text{PC}/\text{DMC}$  electrolyte before (blue) and after (brown) 100 charge/discharge cycles.

As shown in Fig. S10c, the  $\text{EMIM}^+$  peak at  $1574\text{ cm}^{-1}$  (C=C stretching) is hardly noticed in the electrolyte before and after cycling (highlighted). There is a sharp absorbance peak at  $1048\text{ cm}^{-1}$  (C-F stretching) corresponding to  $\text{TFSI}^-$  is present in both neat ionic liquid (reference sample) and cycled electrolyte ( $\text{TFSI}$  signature peak is from  $\text{Ca}(\text{TFSI})_2$ ). However, the intense peak at  $1763\text{ cm}^{-1}$  observed in both before and after electrolyte cycling is due to the C=O stretching in cyclic and linear carbonate-based solvents.

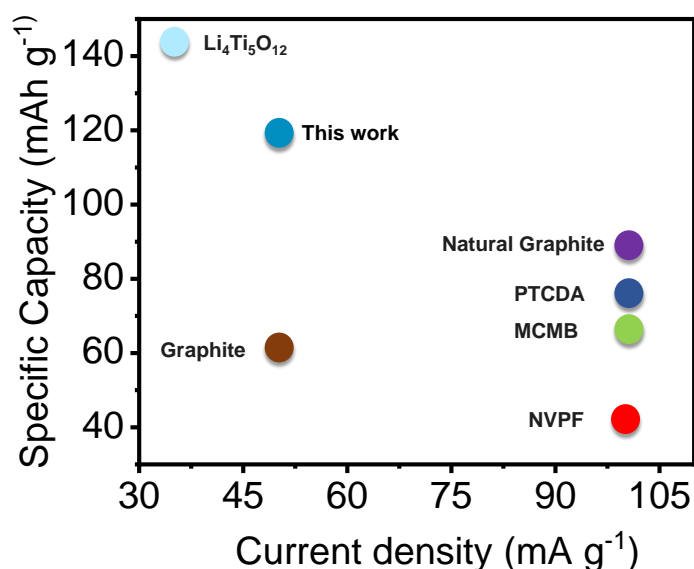

**Fig. S11** Comparison of specific calcination capacities of different reported electrode materials with that of pre-intercalated  $ml\text{-V}_2\text{CT}_x$  MXene (This work).



**Table S1:** Comparison of electrochemical performances of different electrode materials for electrochemical storage of Ca-ions.

| S. No. | Working electrode                   | Electrolyte                                                     | Reversible capacity (mAh g <sup>-1</sup> ) @ Current density (A g <sup>-1</sup> )/C-rate | Cycle number/ capacity retention     | Potential window                      | References |
|--------|-------------------------------------|-----------------------------------------------------------------|------------------------------------------------------------------------------------------|--------------------------------------|---------------------------------------|------------|
| 1.     | NVPF                                | 1M Ca(PF <sub>6</sub> ) <sub>2</sub> in EC/PC                   | 87 @ 0.01                                                                                | 500/90%                              | -1 – 1.5 V<br>vs AC                   | <b>6</b>   |
| 2.     | PEDOT-V <sub>2</sub> O <sub>5</sub> | 1M Ca(ClO <sub>4</sub> ) <sub>2</sub> in Acetonitrile /Water    | 157.2 @ 1                                                                                | 7000/90.8%                           | -0.6 – 1.2 V<br>vs Ag/AgCl            | <b>7</b>   |
| 3.     | PTCDA                               | 3.5 m Ca(FSI) <sub>2</sub> in EC/PC/DMC/EMC                     | 75.4 @ 0.1                                                                               | 350/84.7%                            | 0.5 – 3 V<br>vs AC                    | <b>8</b>   |
| 4.     | MCMB (artificial graphite)          | 0.7 M Ca(PF <sub>6</sub> ) <sub>2</sub> in EC:DMC:EMC           | 66 @ 2C                                                                                  | 300/94%                              | 3 – 5.3 V                             | <b>9</b>   |
| 5.     | Graphite                            | 1 m Ca(TFSI) <sub>2</sub> in tetraglyme                         | 62 @ 0.05                                                                                | no capacity decay during 2000 cycles | -1.0 – 1.0 V<br>vs SHE                | <b>10</b>  |
| 6.     | Natural graphite                    | 0.5 m (Ca(BH <sub>4</sub> ) <sub>2</sub> ) in dimethylacetamide | 87 @ 0.1                                                                                 | 200/negligible degradation           | 0.2 – 1.5 V<br>vs Ca/Ca <sup>2+</sup> | <b>11</b>  |

**Abbreviation:** NVPF- Sodium- vanadium fluorophosphate (Na<sub>1.5</sub>VPO<sub>4.8</sub>F<sub>0.7</sub>), Ca(PF<sub>6</sub>)<sub>2</sub>- Calcium hexafluorophosphate, PEDOT - Poly 3,4-ethylenedioxythiophene, Ca(ClO<sub>4</sub>)<sub>2</sub>- Calcium perchlorate, PTCDA- 3,4,9,10-perylenetetracarboxylicdianhydride, Ca(FSI)<sub>2</sub>- Calcium bis(fluorosulfonyl)imide, MCMB- mesocarbon microbead, Ca(TFSI)<sub>2</sub>- Calcium(II) Bis(trifluoromethanesulfonyl)imide, Ca(BH<sub>4</sub>)<sub>2</sub>- Calcium borohydride.

## REFERENCES

1. M. Alhabeb, K. Maleski, B. Anasori, P. Lelyukh, L. Clark, S. Sin and Y. Gogotsi, *Chem. Mater.*, 2017, **29**, 7633-7644.
2. K. Matthews, T. Zhang, C. E. Shuck, A. VahidMohammadi and Y. Gogotsi, *Chem. Mater.*, 2022, **34**, 499-509.
3. M. Seredych, C. E. Shuck, D. Pinto, M. Alhabeb, E. Precetti, G. Deyscher, B. Anasori, N. Kurra and Y. Gogotsi, *Chem. Mater.*, 2019, **31**, 3324-3332.
4. J. D. Forero-Saboya, E. Marchante, R. B. Araujo, D. Monti, P. Johansson and A. Ponrouch, *J. Phys. Chem. C*, 2019, **123**, 29524-29532.
5. J. M. Shellhamer, P. A. Chando, S. Pathreker, X. Wang and I. D. Hosein, *J. Phys. Chem. C*, 2023, **127**, 19900-19905.
6. Z.-L. Xu, J. Park, J. Wang, H. Moon, G. Yoon, J. Lim, Y.-J. Ko, S.-P. Cho, S.-Y. Lee and K. Kang, *Nat. Commun.*, 2021, **12**, 3369.
7. X. Hao, L. Zheng, S. Hu, Y. Wu, G. Zhang, B. Li, M. Yang and C. Han, *Mater. Today Energy*, 2023, **38**, 101456.
8. J. Li, C. Han, X. Ou and Y. Tang, *Angew. Chem. Int. Ed.*, 2022, **61**, e202116668.
9. S. Wu, F. Zhang and Y. Tang, *Adv. Sci.*, 2018, **5**, 1701082.
10. S. J. Richard Prabakar, A. B. Ikhe, W. B. Park, K.-C. Chung, H. Park, K.-J. Kim, D. Ahn, J. S. Kwak, K.-S. Sohn and M. Pyo, *Adv. Sci.*, 2019, **6**, 1902129.
11. J. Park, Z.-L. Xu, G. Yoon, S. K. Park, J. Wang, H. Hyun, H. Park, J. Lim, Y.-J. Ko, Y. S. Yun and K. Kang, *Adv. Mater.*, 2020, **32**, 1904411.
